# Supplementary material for: Development of an in vitro platform for the analysis of contractile and calcium dynamics in single human myotubes
Source: Royal Society of Chemistry journal article supplement (doi:10.1039/d3lc00442b), 2024-01-01
Supplement: d3lc00442b3.pdf [file d3lc00442b3.pdf]

| SI                 | SI | SI | SI |
|--------------------|----|----|----|
| [Redacted Content] |    |    |    |
