# Supplementary material for: Development of an in vitro platform for the analysis of contractile and calcium dynamics in single human myotubes
Source: Royal Society of Chemistry journal article supplement (doi:10.1039/d3lc00442b), 2024-01-01
Supplement: d3lc00442b7.pdf [file d3lc00442b7.pdf]

Supplementary Information (SI) for Lab on a Chip

This journal is © The Royal Society of Chemistry 2024
