# Supplementary material for: Development of an in vitro platform for the analysis of contractile and calcium dynamics in single human myotubes
Source: Royal Society of Chemistry journal article supplement (doi:10.1039/d3lc00442b), 2024-01-01
Supplement: d3lc00442b9.pdf [file d3lc00442b9.pdf]

ARTICLE

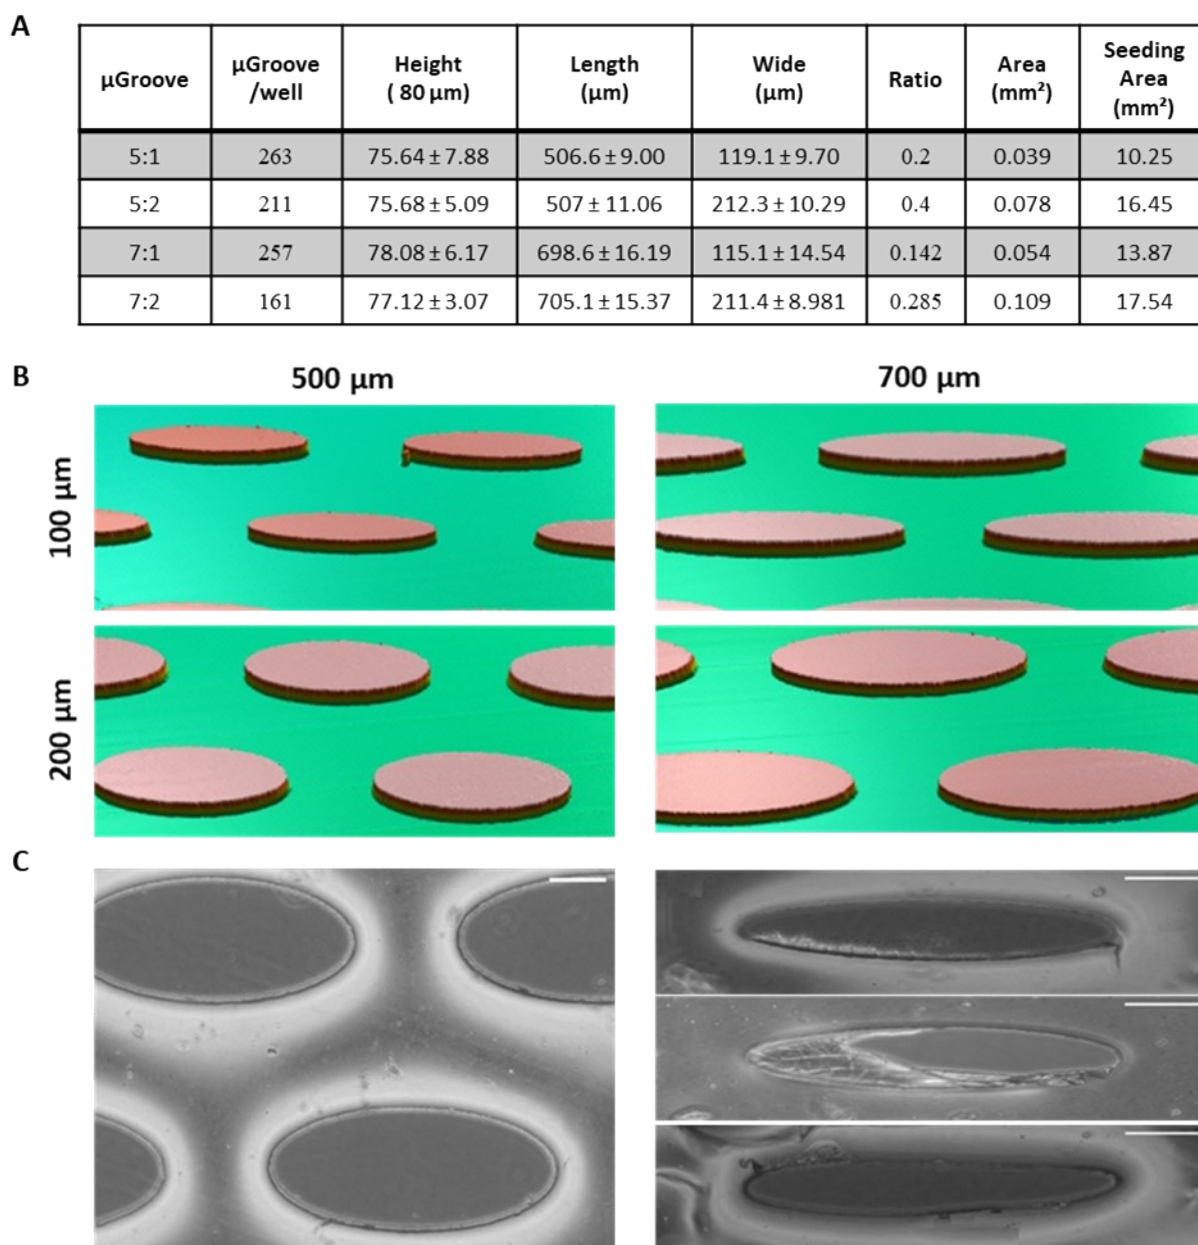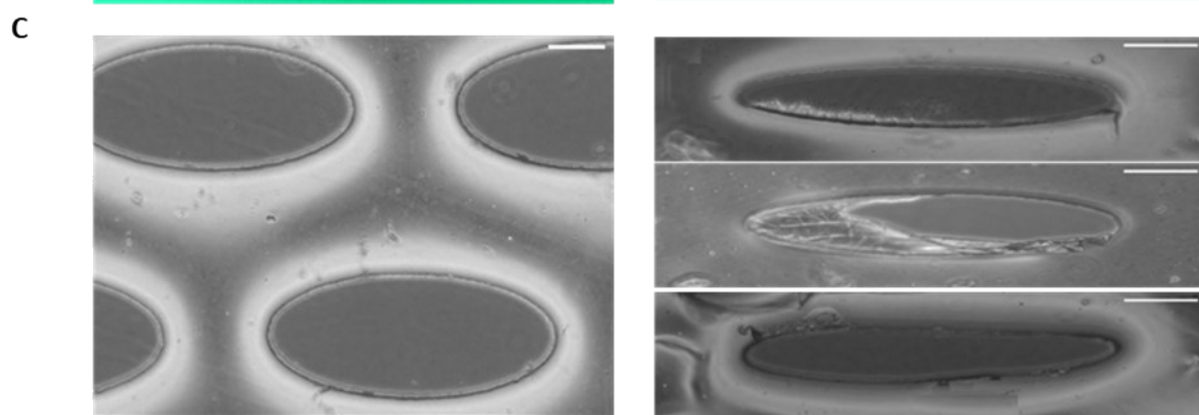

**Supplementary Figure 1.** Characterization of SU-8 masters and  $\mu$ Groove substrates. **(A)** Experimental dimensions of 5:1, 5:2, 7:1 and 7:2  $\mu$ Groove geometries. For Si masters, five pictures were taken along the samples with the profilometer to consider possible inhomogeneities inherent to the fabrication process. Values are expressed as mean  $\pm$  SD. **(B)** Representative images of SU-8 masters characterized with an optical profilometer. **(C)** Representative brightfield images of  $\mu$ Groove structures (5:2, left panel). In some cases, delamination artifacts were observed causing shape distortion or partially closed structures (right panel). Scale bar: 100  $\mu$ m.

| MEDIA                                   | COMPONENTS                                            | REF            | BRAND       |
|-----------------------------------------|-------------------------------------------------------|----------------|-------------|
| Growth Media                            | Skeletal muscle cell growth medium + Supplemented mix | PB-MH-272-0090 | PELObiotech |
|                                         | 10% Fetal Bovine serum (FBS)                          | 10270-106      | Gibco       |
|                                         | 50 µg/ml Gentamicin                                   | 15750037       | Gibco       |
|                                         | 1X Glutamax                                           | 35050038       | Gibco       |
| Basic Differentiation Media (bDM)       | DMEM                                                  | 41966029       | Gibco       |
|                                         | 100 µg/ml Apotransferine                              | T1147          | SIGMA       |
|                                         | 50 µg/ml Gentamicin                                   | 15750037       | SIGMA       |
|                                         | 10 µg/ml Insulin                                      | I2643          | SIGMA       |
| Complete Differentiation Media (cDM)    | Newobasal medium                                      | 10888022       | Gibco       |
|                                         | 1X B27 Supplement                                     | 17504044       | Gibco       |
|                                         | 20 ng/ml Brain Derived Neurotrophic Factor (BDNF)     | 450-02         | PEPROTECH   |
|                                         | 5 ng/ml Ciliary Neurotrophic Factor CNTF              | 450-13         | PEPROTECH   |
|                                         | 50 µg/ml Gentamicin                                   | 15750037       | GIBCO       |
|                                         | 1X Glutamax                                           | 35050038       | Gibco       |
|                                         | 10 ng/ml Insulin-like growth Factor 1 IGF-1           | I3769          | SIGMA       |
|                                         | 4 µg/ml Laminin                                       | L2020          | SIGMA       |
|                                         | 20 ng/ml Neurotrophin 3 NT-3                          | 450-03         | PEPROTECH   |
|                                         | 50 ng/ml Recombinant Human Sonic Hedgehog (Shh)       | 100-45         | PEPROTECH   |
| 100 ng/ml Recombinant Rat Agrin Protein | 550-AG                                                | R&D SYSTEMS    |             |

**Supplementary Figure 2.** Human immortalized skeletal muscle media components.

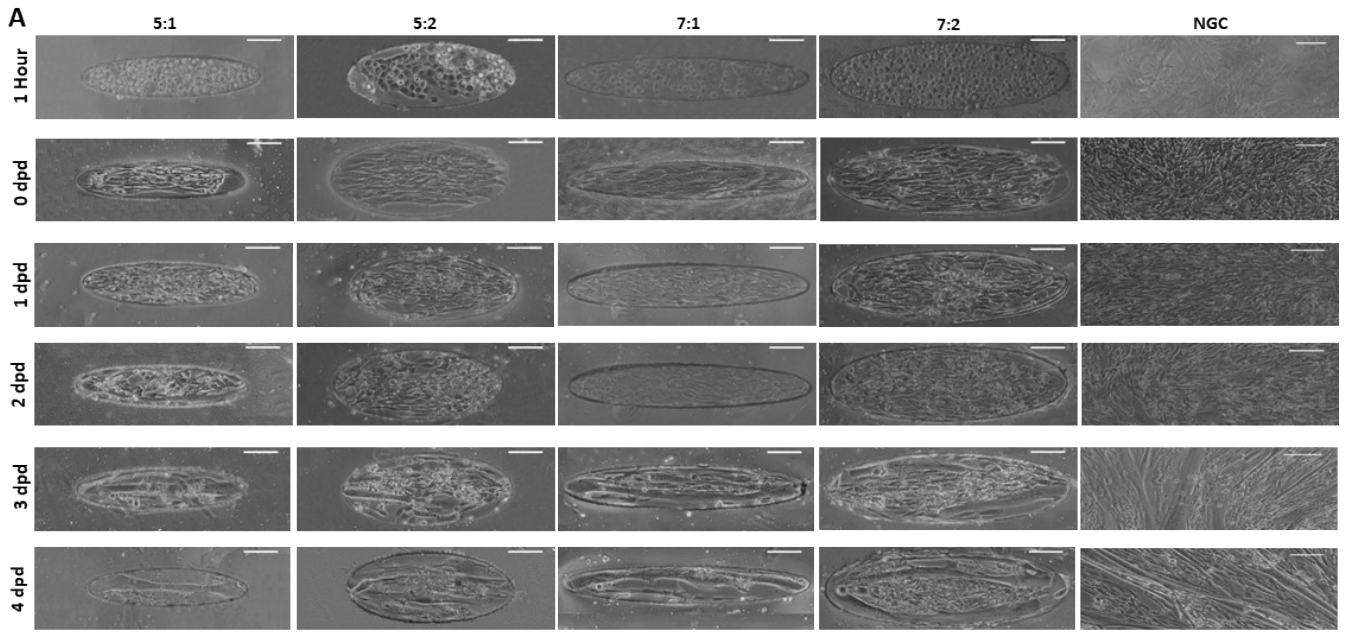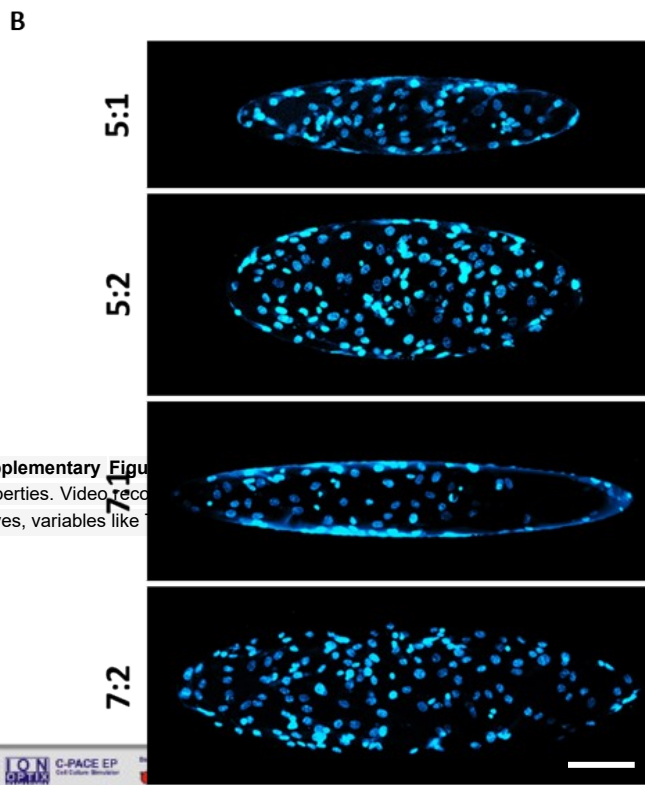

Supplementary Figure 3. Video recordings of myotubes were analyzed with MUSCLEMOTION software. From these curves, variables like

promotes myotubes differentiation and maturation, thus increasing their contractile properties. Video recordings of myotubes were performed at 4-dpd and analyzed with MUSCLEMOTION software. From these curves, variables like RT<sub>50</sub> were determined.

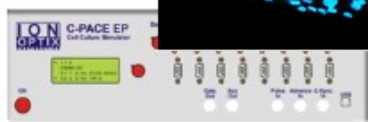

**Electrical Stimulation Unit**

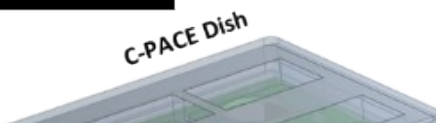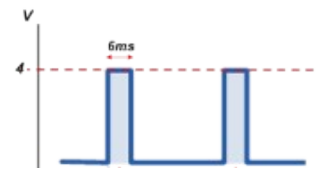

**Supplementary Figure 3.** Immortalized human myotubes development (8220). (A) Myoblast fuse and differentiate into isolated contractile myotubes within  $\mu$ Grooves of different geometries. Differentiation was promoted 24 hours after seeding (0 days in differentiation, 0 dpd). (B) Representative fluorescent images of DAPI stained nuclei 4 hours post-seeding. Scale bar: 100  $\mu$ m

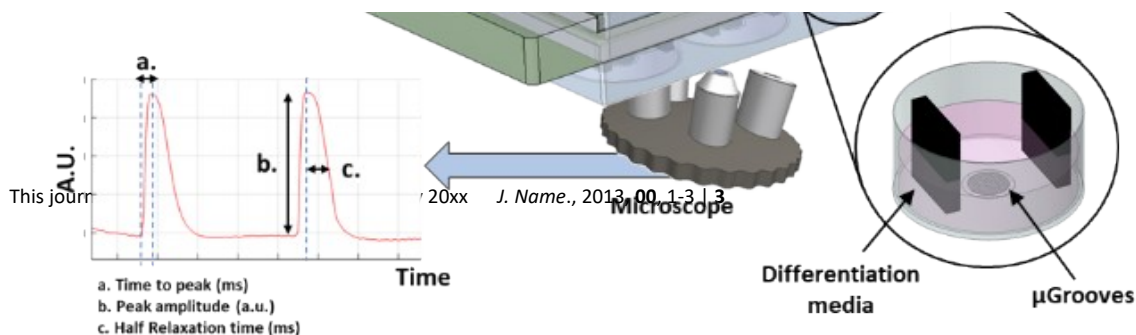



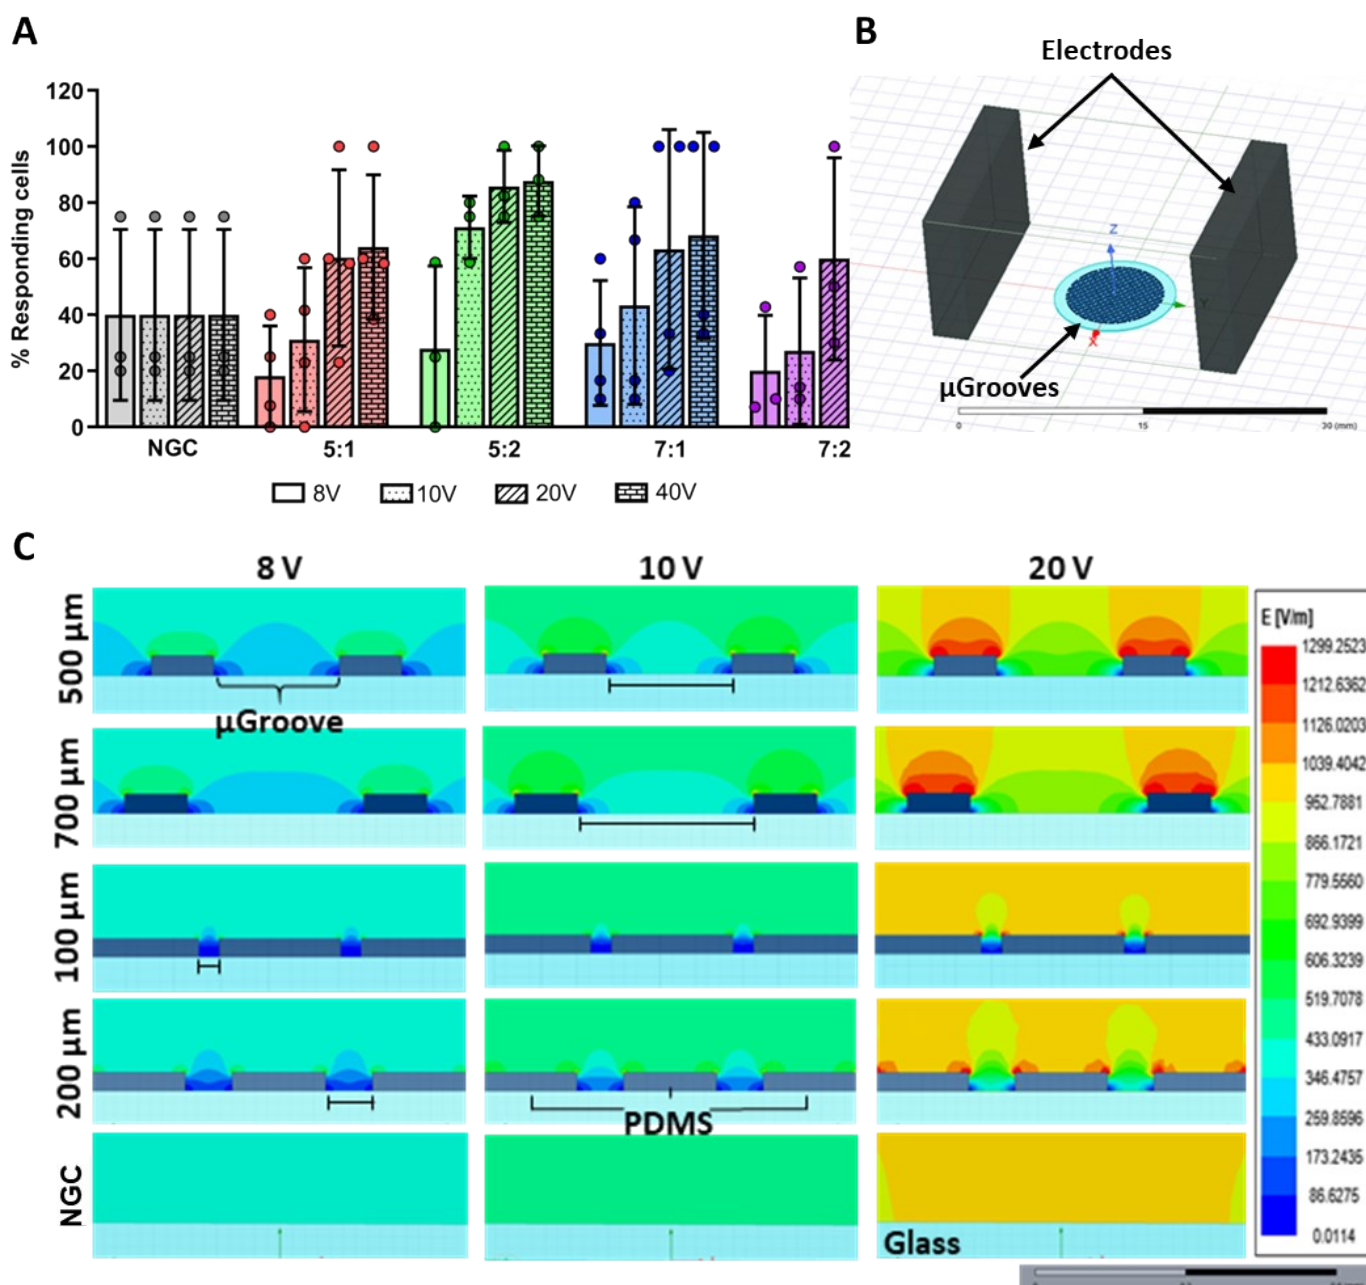

**Supplementary Figure 5. Myotubes Excitability.** (A) Myotubes were electrical stimulated at increasing voltages (4-40 V). Random fields have been selected in the case of the controls and full grooves in the case of the different geometries. We calculated the % of responding myotubes under electrical stimulation as the ratio of those contracting to those not contracting in the selected field. All myotubes grown in the NGC responded at 8 V while for the ones grown within  $\mu$ Grooves, this response was highly dependent of voltage, increasing this parameter increase the number of myotubes that contract. (B)  $\mu$ Grooves were simulated in Ansys Electronics software to study the electric field behaviour in the  $\mu$ Grooves. (C) Electric field simulation for 8, 10 and 20 V in  $\mu$ Grooves and NGC. Voltages of 4 and 40 were not analyzed because, for the first case, we obtained no response in either  $\mu$ Grooves or NGC, and for the second case, all myotubes responded to this voltage. Width and length are displayed to check both orientations.

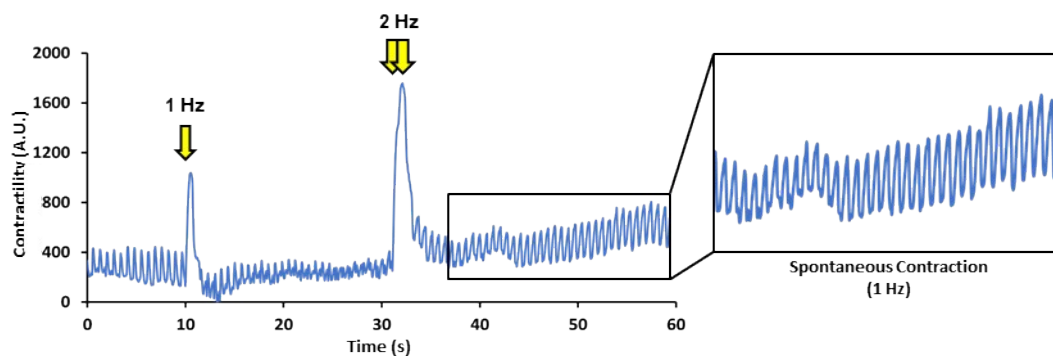

**Supplementary Figure 6.** Spontaneous contraction was observed after chronic stimulation with a frequency of approximately 1 Hz. In some cases, these spontaneous contractions were observed while evaluating the myotubes under increasing frequencies (yellow arrows).

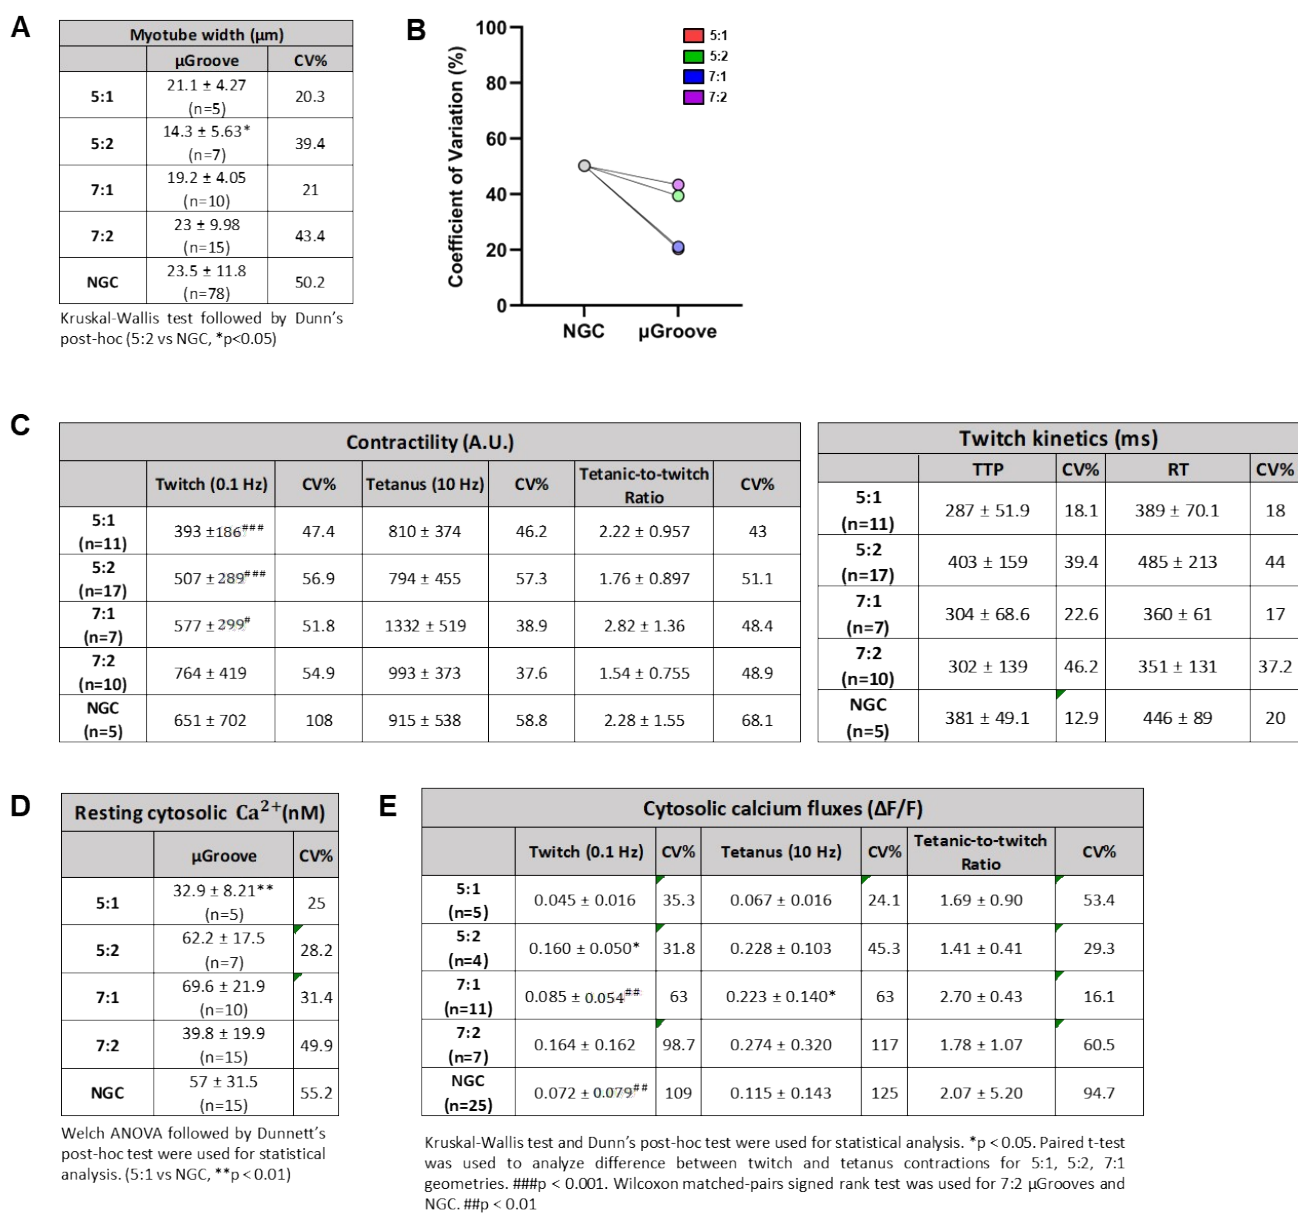

**Supplementary Figure 7.** Coefficient of variation percentage (CV%) of  $\mu\text{Grooved}$  myotubes and non-grooved controls (NGC) for different assays. (A) Myotube width ( $\mu\text{m}$ ). (B) Coefficient of variation (%CV) of myotube width datasets. The %CV decreased by 59.56%, 27%, 59.76% and 13.54% for 5:1, 5:2, 7:1 and 7:2  $\mu\text{Grooves}$ , respectively, compared to NGC. Dots represent values from different  $\mu\text{Groove}$  geometries. (C) Twitch and tetanic contractility measured by peak amplitude (A.U., arbitrary units; left panel), and twitch kinetics for time to peak (TTP) and half-relaxation time ( $\text{RT}_{50}$ ; right panel) (D) Resting cytosolic  $\text{Ca}^{2+}$  (nM). (E) Cytosolic calcium fluxes in response to twitch and tetanic stimuli. Statistical analyses performed are detailed below each table.

**Supplementary Video 1** Spontaneous Contractions in  $\mu$ Grooves substrates.
