# Supplementary figures and images for: Development of an in vitro platform for the analysis of contractile and calcium dynamics in single human myotubes
Source: Royal Society of Chemistry journal article supplement (doi:10.1039/d3lc00442b), 2024-01-01

| Device | Flow<br>Rate | Flow<br>Rate<br>( $\mu\text{m}^2/\text{s}$ ) |
|--------|--------------|----------------------------------------------|----------------------------------------------|----------------------------------------------|----------------------------------------------|----------------------------------------------|----------------------------------------------|----------------------------------------------|
| S1     | 100          | 10000.00                                     | 10000.00                                     | 10000.00                                     | 10000.00                                     | 10000.00                                     | 10000.00                                     | 10000.00                                     |
| S2     | 200          | 20000.00                                     | 20000.00                                     | 20000.00                                     | 20000.00                                     | 20000.00                                     | 20000.00                                     | 20000.00                                     |
| S3     | 300          | 30000.00                                     | 30000.00                                     | 30000.00                                     | 30000.00                                     | 30000.00                                     | 30000.00                                     | 30000.00                                     |
| S4     | 400          | 40000.00                                     | 40000.00                                     | 40000.00                                     | 40000.00                                     | 40000.00                                     | 40000.00                                     | 40000.00                                     |

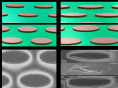

Supplement: d3lc00442b2.pdf [file d3lc00442b2.pdf]

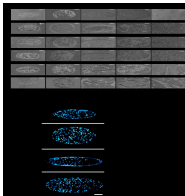

Supplement: d3lc00442b4.pdf [file d3lc00442b4.pdf]

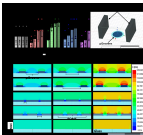

Supplement: d3lc00442b6.pdf [file d3lc00442b6.pdf]

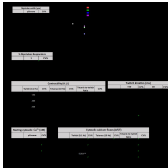

Supplement: d3lc00442b8.pdf [file d3lc00442b8.pdf]
